# Supplementary material for: Whole-exome sequencing in 16,511 individuals reveals a role of the HTRA1 protease and its substrate EGFL8 in brain white matter hyperintensities
Source: bioRxiv or medRxiv preprint supplement (doi:10.1101/2021.03.26.21253954), 2021-03-29

Suppl Fig 2

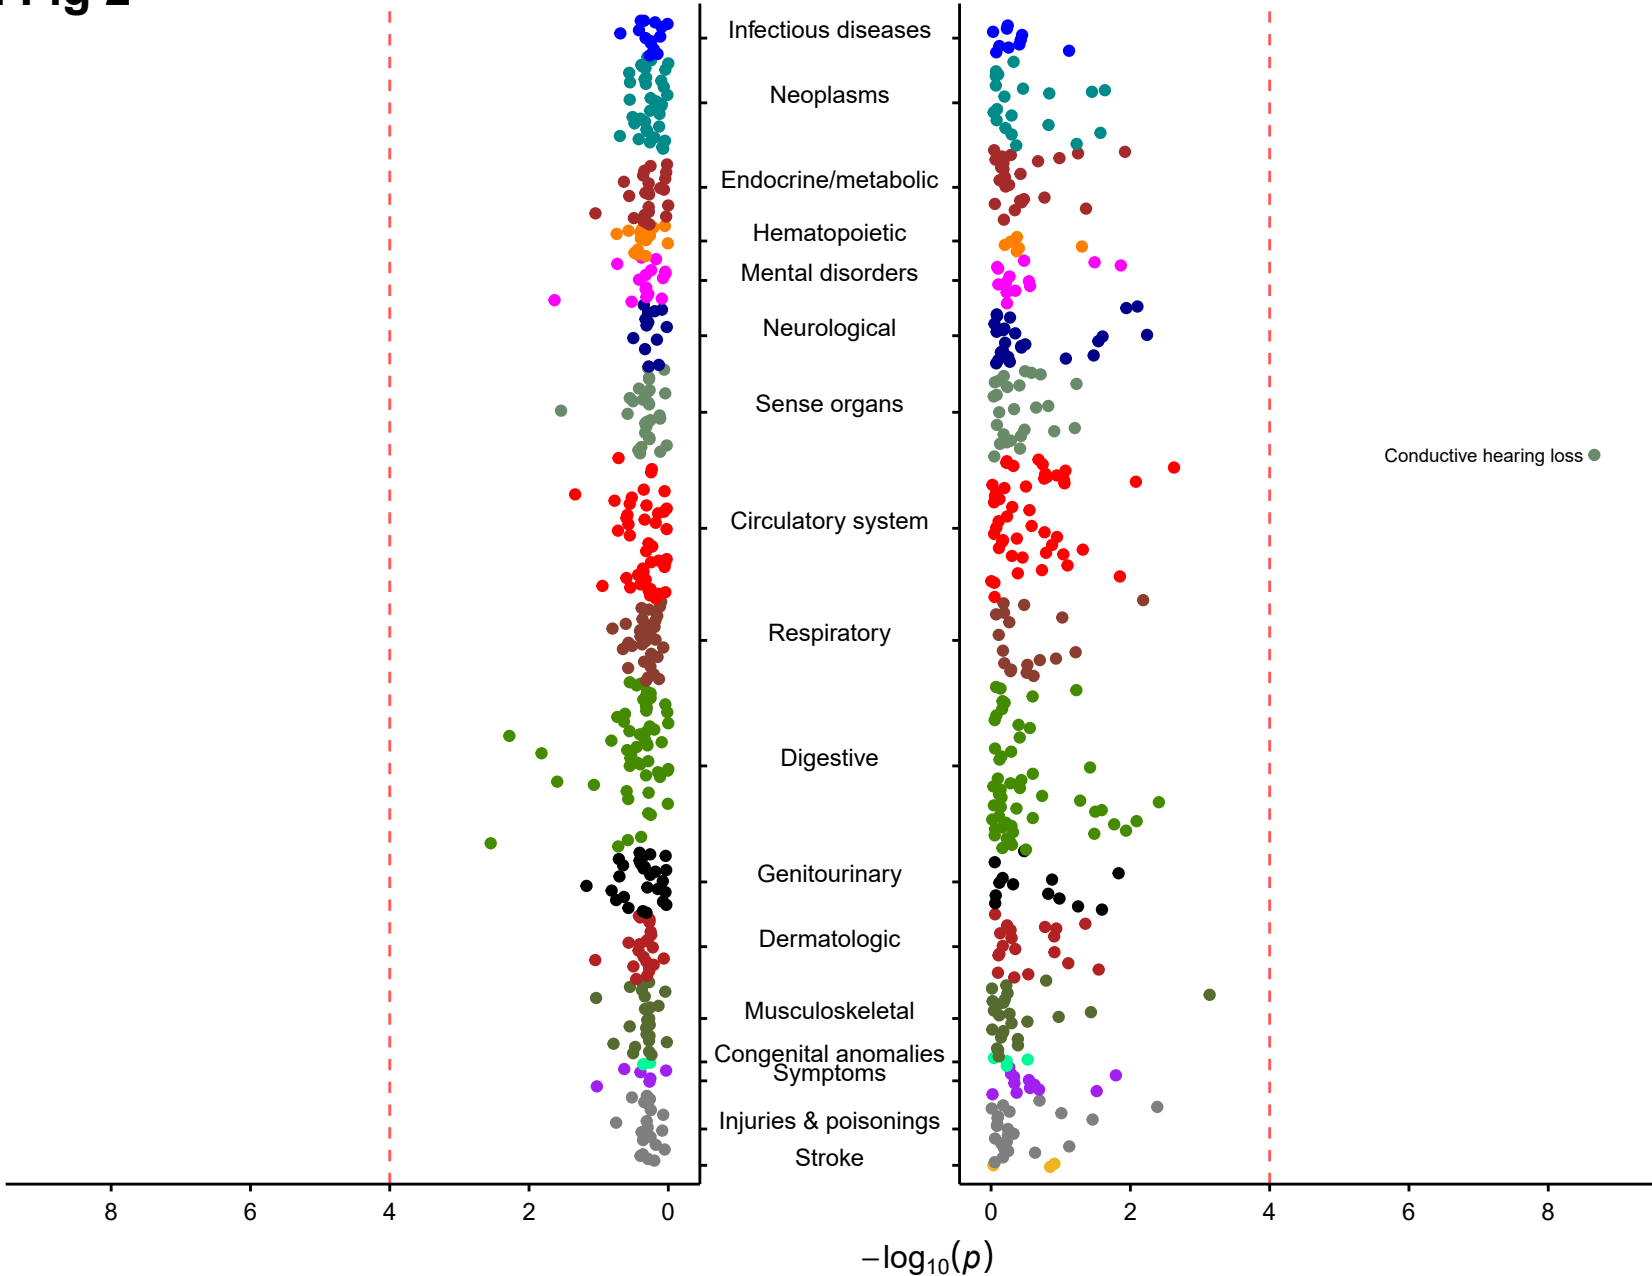

Supplement: Supplementary file [file media-3.pdf]
